# Supplementary material
Source: publisher site journal article supplement (https://www.spandidos-publications.com/7492/downloadSupplementary)

Figure S1. Wild-type plasmid hCOL1A1-W exhibited three splicing patterns, including (A) colla1-V1, (B) colla1-V2 and (C) colla1-V3. (A) In colla1-V1 intron 47 was deleted. (B) Colla1-V2 retained the entire intron 47. (C) In colla1-V3 the entire intron 47 and part of exon 48 was deleted. The pink box represents the position of c.3531+1, where the base is a wild-type G.

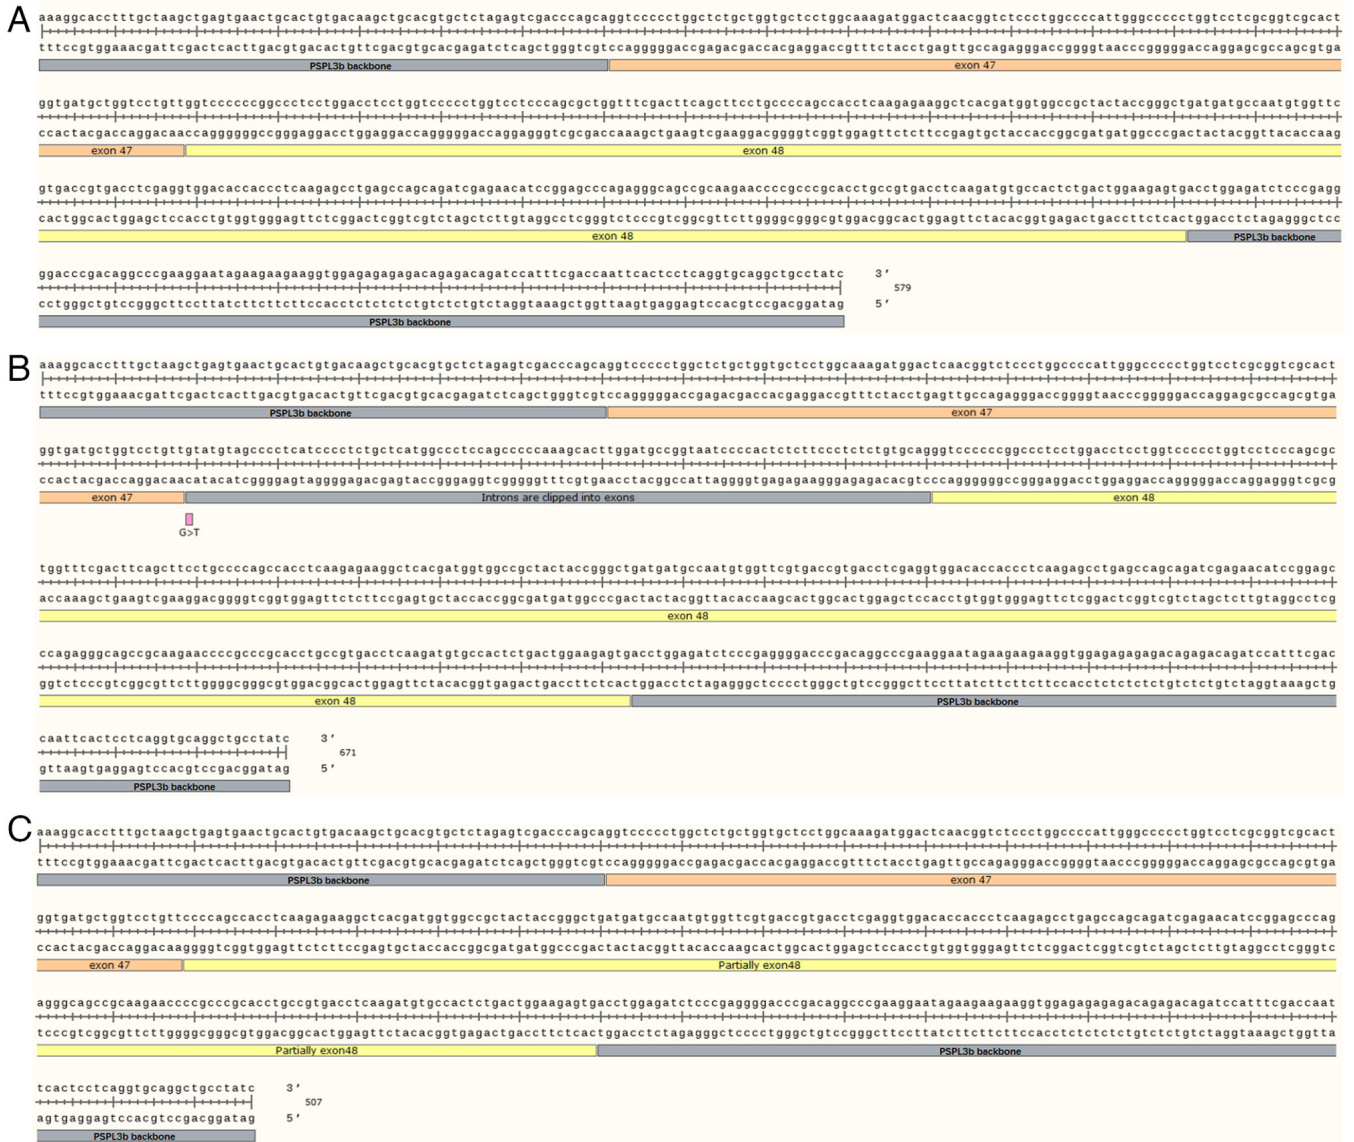

Supplement: Supplementary file 1 [file downloadSupplementary]
